# Supplementary material
Source: MDPI journal article supplement (https://www.mdpi.com/2673-995X/3/4/84)
Supplement: s1 [file s1]

# Supplementary Material

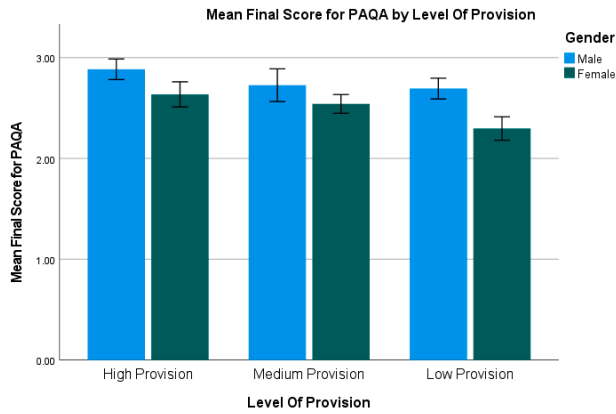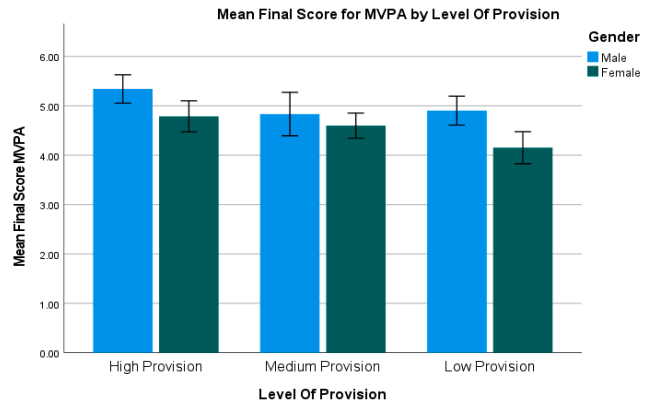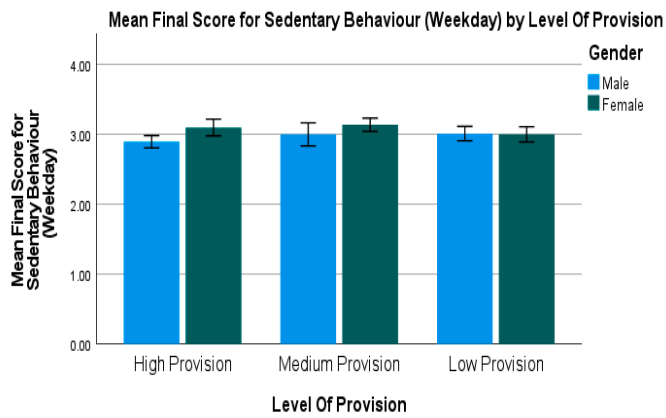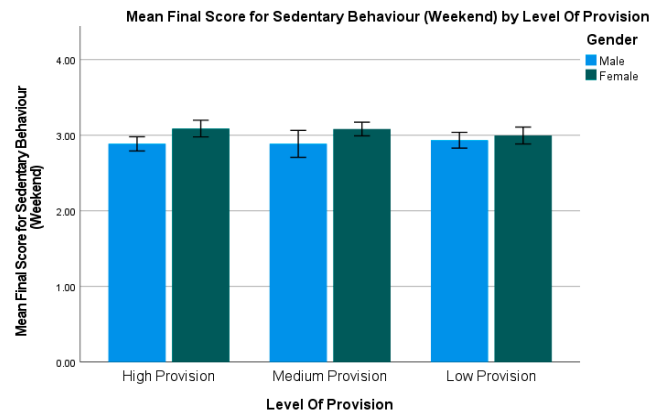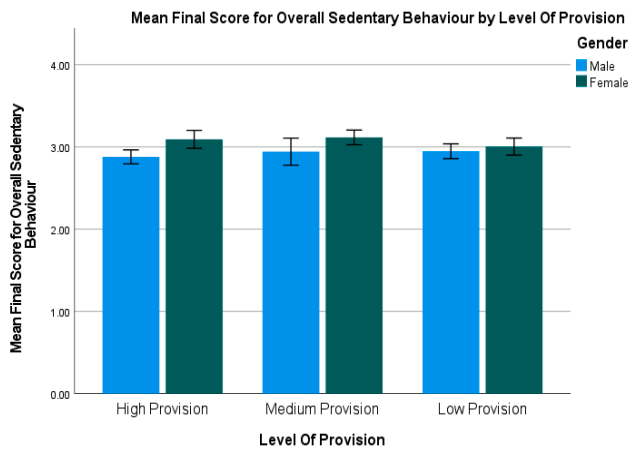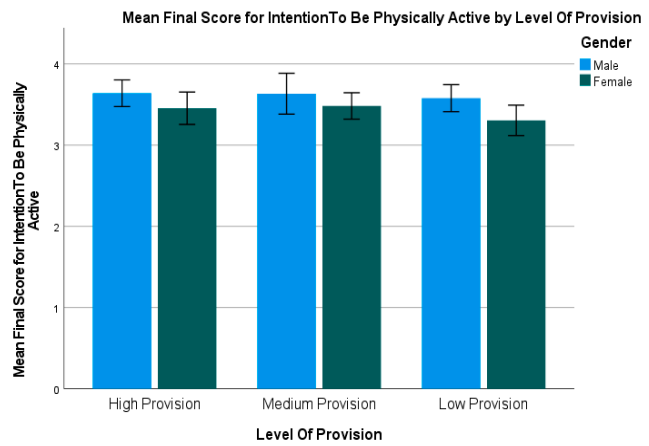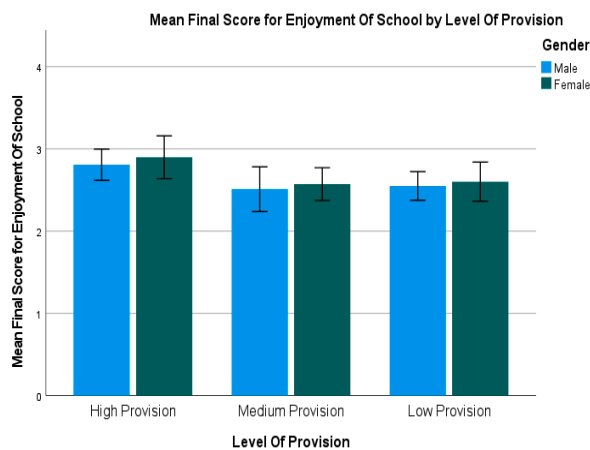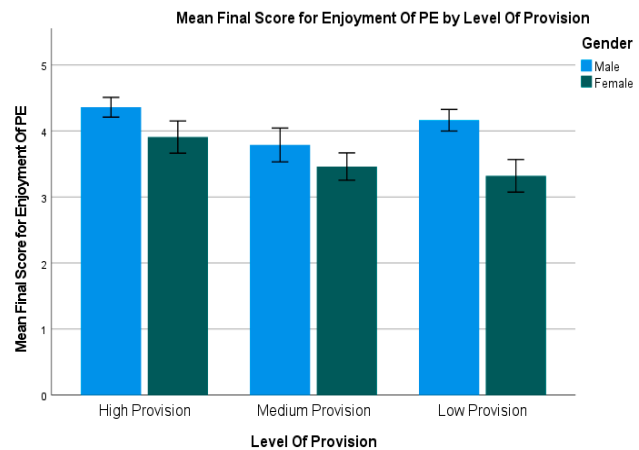

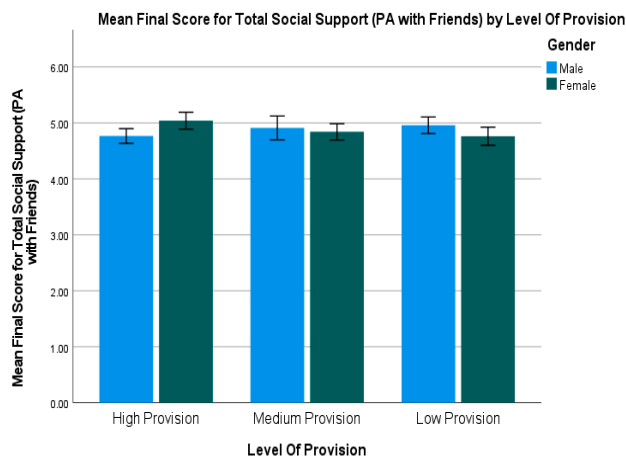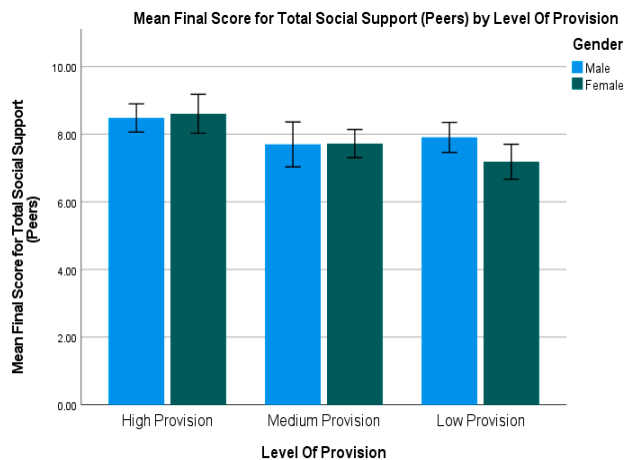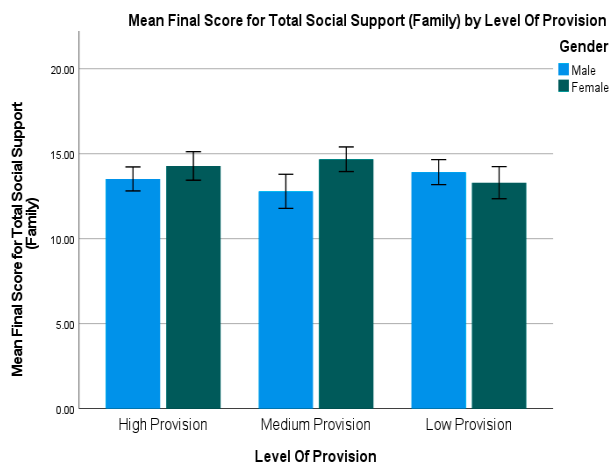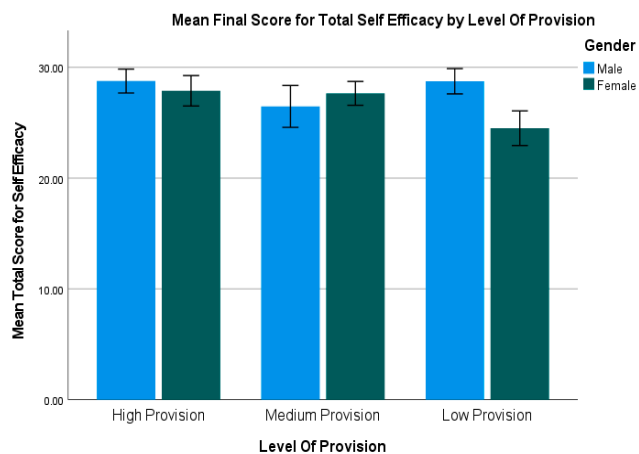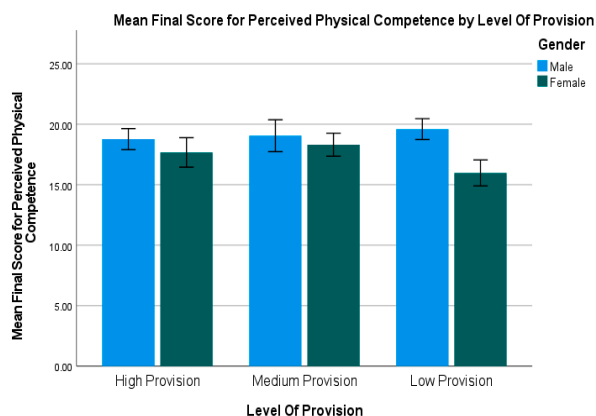

Notes: x axis = different levels of typical school provision of physical education, physical activity and sports; y axis = mean final score

**Figure S1. Bar Charts for each physical activity behaviors outcome variable and levels of provision (Error Bars 95% CI)**

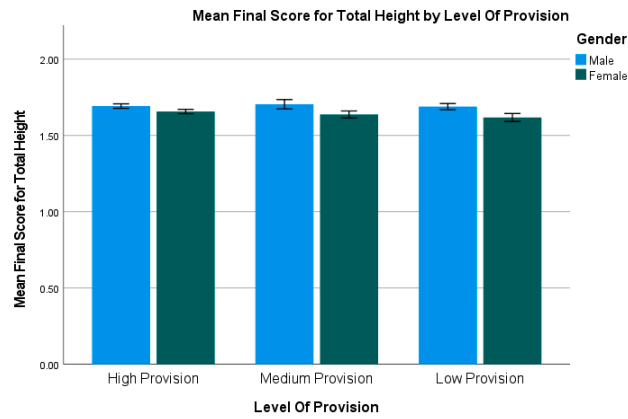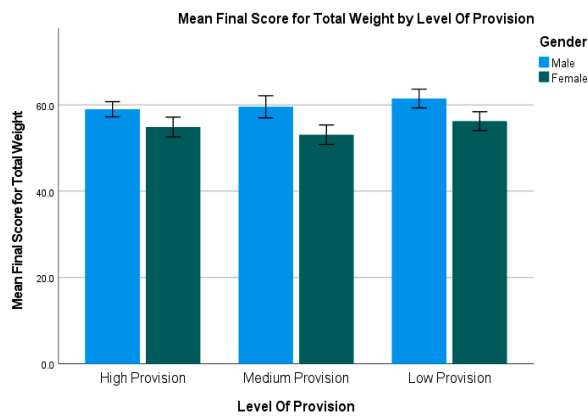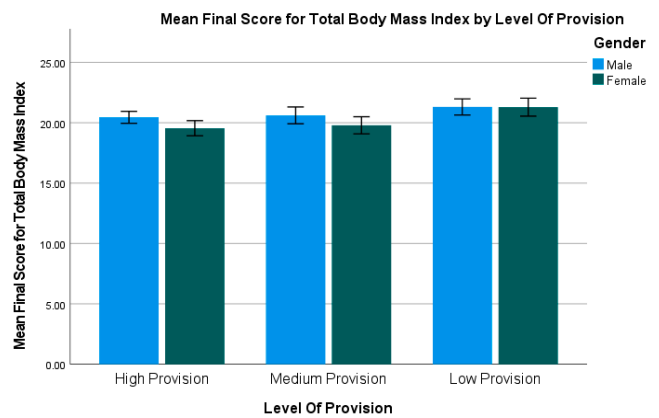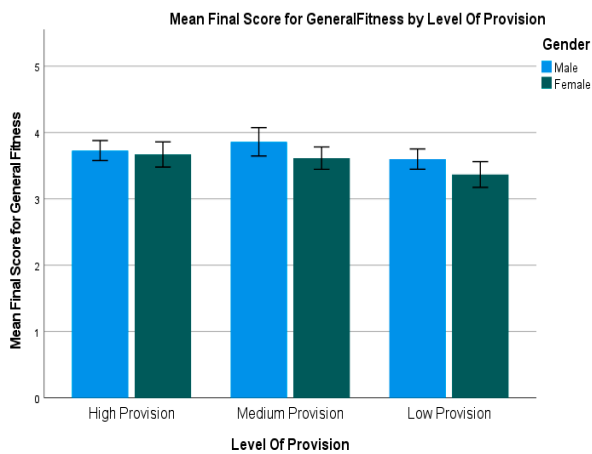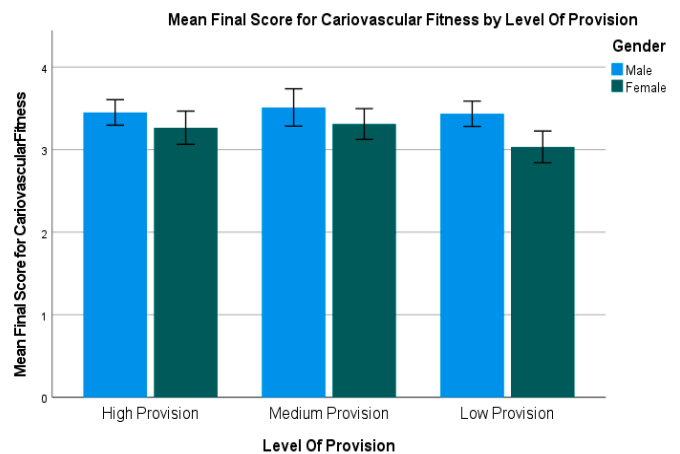

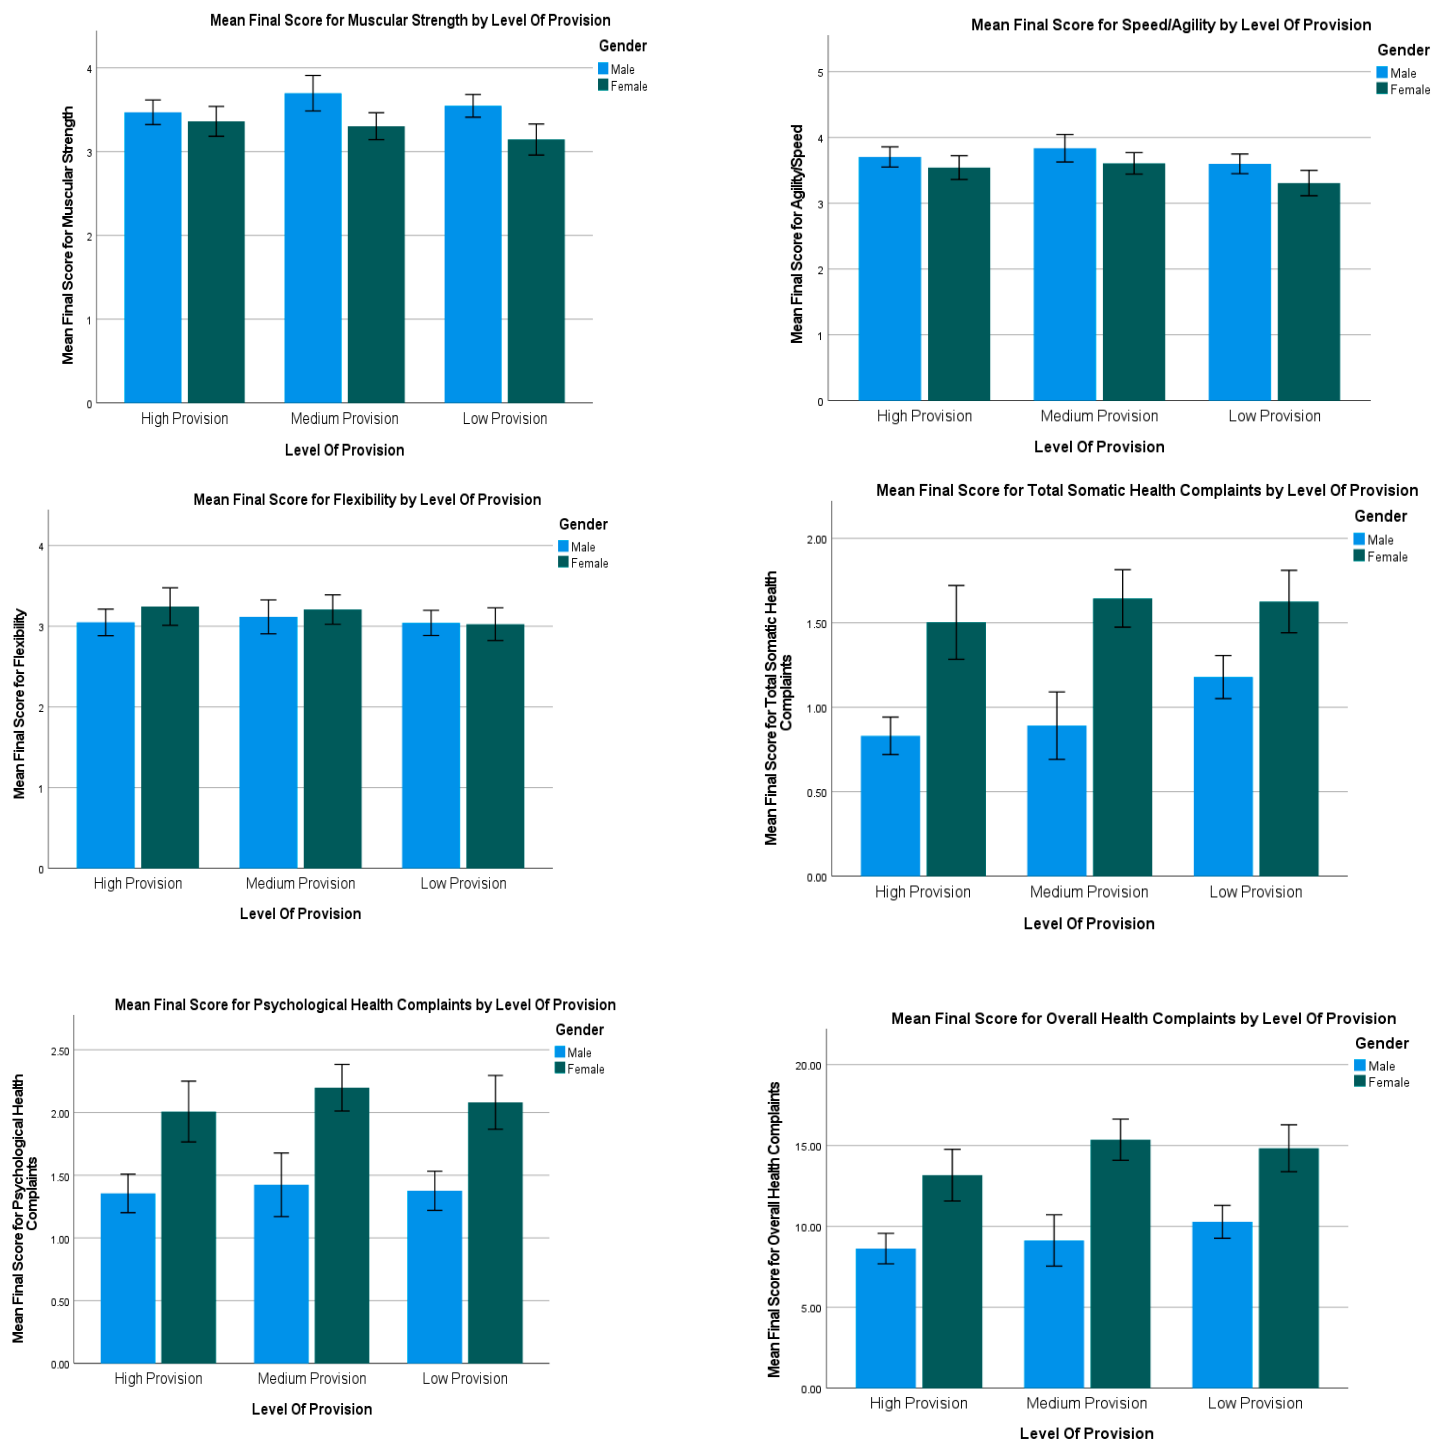

Notes: x axis = different levels of typical school provision of physical education, physical activity and sports; y axis = mean final score

**Figure S2. Bar Charts for each health outcome variable and levels of provision (Error Bars 95% CI)**

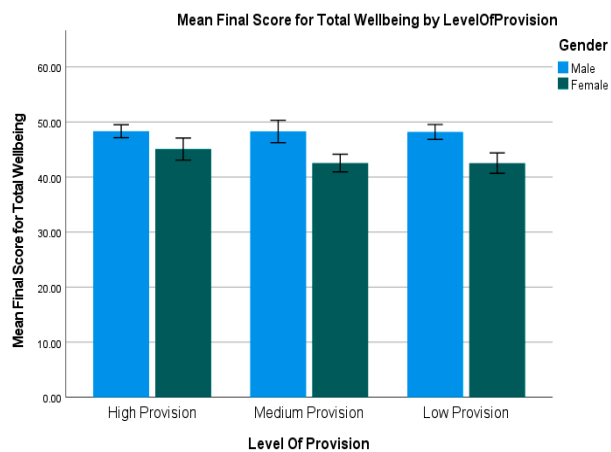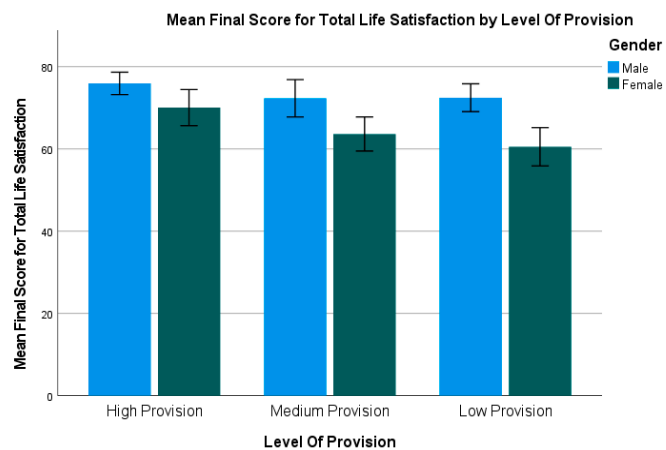

Notes: x axis = different levels of typical school provision of physical education, physical activity and sports; y axis = mean final score

**Figure S3. Bar Charts for each wellbeing outcome variable and levels of provision (Error Bars 95% CI)**
